# Supplementary material for: Galectin-3 is required for the microglia-mediated brain inflammation in a model of Huntington’s disease
Source: PubMed Central journal article supplement (PMC6677843; doi:10.1038/s41467-019-11441-0), 2019-08-02
Supplement: 41467_2019_11441_MOESM3_ESM.pdf [file 41467_2019_11441_MOESM3_ESM.pdf]

**Imaging processing and quantification:**

1. Open file.
2. For image containing far red channel >Edit> Duplicate plane (all plane for analysis)
3. For RGB image >Display>Colour Separate
4. Process> Arithmetic
  - Source image 1: All image/plane from previous step
  - Source 2: Constant value
  - Result section – Image: Add
  - Bit depth: 16 bit
  - Operation: Add
  - Constant value: 0 gray levels
  - New image file will be generated (Add-1, Add-2 ...)
5. Apps> Multi wavelength cell scoring
  - Number of wavelengths: 4 (depending on the image containing how many channels, channel-1 (Add-1) always for All nuclei)
  - Display result image: Segmentation (Check)
  - Select source image according the channel arrangement (Add-1, Add-2 ...)
  - Stain area: Select nucleus, cytoplasm or both
  - Scoring parameter:
    - Min width: *refer to each figure setting*  $\mu\text{m}$
    - Max width: *refer to each figure setting*  $\mu\text{m}$
    - Intensity above local background: *refer to each figure setting* graylevels
6. Configure Data Log (Parameter configuration)
  - Image name
  - Cell: Assigned Label#
  - Cell: Total Area
  - Cell: Positive W2
  - Cell: W2 Stained Area
  - Cell: W2 Stained Integr Intensity
  - Cell: W2 Stained Average Intensity
  - Cell: W2 Nucleus Integr Intensity (*Optional*)
  - Cell: W2 Nucleus Average Intensity (*Optional*)
  - Cell: W2 Cytoplasm Integr Intensity (*Optional*)
  - Cell: W2 Cytoplasm Average Intensity (*Optional*)

Same parameter configuration for other wavelengths (i.e., W3, W4)

Log column titles (check)

7. For tissue sample images, IbaI signals are used to identify microglia.
  - Example, IbaI is represented by wavelength 2 (W2), under the Cell: Positive W2 column, “0” value will be filtered, and the remaining column with “1” value represent microglia (“0” = W2 (IbaI) – negative cells; “1” = W2 (IbaI) – positive cells).

## **Puncta quantification:**

1. Open image file.
2. Save files as Meta Single/Multiple Plane TIFF.
3. Edit> Duplicate > all plane
4. Process> Morphology Filters
  - Source image: select puncta plane
  - Result image: Top Hat
  - Operation: Extract features > Top hat
  - Filter shape: Circle
  - Diameter 10 pixels
  - Reconstruction (check)
5. Process> Arithmetic
  - Source image 1: Select nucleus frame
  - Source image 2: Constant value
  - Result > Image > Add
  - Bit depth: 16 bit
  - Operation: Add
  - Constant values: 0
6. Repeat step 5 on Top Hat generated puncta plane in Step 4.
7. Repeat step 5 on positive marker plane.
8. Apps> Cell scoring
  - W1 Source image: Nuclear image generated from Step 5 (i.e., Add)
    - Min width: 6
    - Max width: 12
    - Intensity above local background: 8 gray levels
  - W2 Source image: Positive marker image generated from Step 5 (i.e., Add-3)
    - Stained area: Cytoplasm and nucleus
    - Min width: 5
    - Max width: 40
    - Intensity above local background: 20 gray levels
  - Display result image: Segmentation (check)
9. Process> Binary operations
  - Source image: Segmentation generated in Step 8
  - Result image: Binary
  - Operation >Binarize

- Parameters: 1 – 3

#### 10. Process> Arithmetic

- Source image 1: puncta plane generated in Step 5 (i.e., Add-2)
- Source image 2: Binary generated at Step 9
- Result image: AND
- Bit depth: 16 bit
- Operation: Logical AND

#### 11. Apps> Granularity

- Granule image: AND generated from Step 10
  - Display result image: Granules (check)
  - Min width: 0.8
  - Max width: 1.3
  - Intensity above local background: 100
- Nuclear image: nuclear plane generated from Step 5 (i.e., Add)
  - Min width: 6
  - Max width: 12
  - Intensity above local background: 5

#### 12. Configure Data Log (Cells)

- Image Name
- Cell: Assigned Label #
- Cell: Granule Count
- Cell: Granule Total Area
- Cell: Granule Integrated Intensity
- Cell: Granule Average Intensity

## Colocalization quantification:

1. Open file.
2. For image containing far red channel >Edit> Duplicate plane (all plane for analysis)
3. For RGB image >Display>Colour Separate
4. Process> Arithmetic
  - Source image 1: All image/plane from previous step
  - Source 2: Constant value
  - Result section – Image: Add
  - Bit depth: 16 bit
  - Operation: Add
  - Constant value: 0 gray levels
5. New image file will be generated (Add-1, Add-2 ...)
6. Process> Morphology Filters
  - Source image: select planes to measure
  - Result image: Top Hat
  - Operation: Extract features > Top hat
  - Filter shape: Circle
  - Diameter: For LAMP1 > 5 pixels > Use reconstruction (check)  
Gal3 > 5 pixels > Use reconstruction (check)
  - Reconstruction (check)
7. Measure> Threshold Image
  - Inclusive LAMP1: 15-255
  - Inclusive Gal3: 20-255
8. Apps>Colocalization

**Quantification Parameters:**

(Unless stated otherwise, W1, W2, W3 and W4 indicates blue, green, red and far red fluorescence signal, respectively.)

Fig. 2D

Scoring parameter:

|                                  | <b>W1</b> | <b>W2</b> | <b>W3</b> | <b>W4</b> |
|----------------------------------|-----------|-----------|-----------|-----------|
| Min width                        | 5         | 3         | 3         | -         |
| Max width                        | 15        | 100       | 100       | -         |
| Intensity above local background | 5         | 11        | 25        | -         |
| Minimum stained area             | -         | 10        | 10        | -         |

Fig. 2F

|                                  | <b>W1</b> | <b>W2</b> | <b>W3</b> | <b>W4</b> |
|----------------------------------|-----------|-----------|-----------|-----------|
| Min width                        | 5         | 5         | -         | 5         |
| Max width                        | 24        | 24        | -         | 24        |
| Intensity above local background | 40        | 4         | -         | 4         |
| Minimum stained area             | -         | 40        | -         | 40        |

Fig. 2J

|                                  | <b>W1</b> | <b>W2</b> | <b>W3</b> | <b>W4</b> |
|----------------------------------|-----------|-----------|-----------|-----------|
| Min width                        | 4         | 4         | 2         | -         |
| Max width                        | 30        | 30        | 30        | -         |
| Intensity above local background | 15        | 20        | 90        | -         |
| Minimum stained area             | -         | 5         | 5         | -         |

Fig. 3A

|                                  | <b>W1</b> | <b>W2</b> | <b>W3</b> | <b>W4</b> |
|----------------------------------|-----------|-----------|-----------|-----------|
| Min width                        | 5         | 5         | 5         | 5         |
| Max width                        | 20        | 20        | 20        | 20        |
| Intensity above local background | 50        | 20        | 20        | 20        |
| Minimum stained area             | -         | 100       | 100       | 100       |

Fig. 4A

|                                  | <b>W1</b> | <b>W2</b> | <b>W3</b> | <b>W4</b> |
|----------------------------------|-----------|-----------|-----------|-----------|
| Min width                        | 5         | 5         | 5         | 5         |
| Max width                        | 20        | 20        | 20        | 20        |
| Intensity above local background | 50        | 20        | 20        | 20        |
| Minimum stained area             | -         | 100       | 100       | 100       |

Fig. 6B

Cell scoring

|                                  | <b>W1</b> | <b>W2</b>             | <b>W3</b> | <b>W4</b> |
|----------------------------------|-----------|-----------------------|-----------|-----------|
| Min width                        | 6         | 5                     | -         | -         |
| Max width                        | 12        | 40                    | -         | -         |
| Intensity above local background | 8         | 20                    | -         | -         |
| Stained area                     | -         | Cytoplasm and nucleus | -         | -         |

Granularity

|                                  | <b>Granule image</b> | <b>Nuclear image</b> | - | - |
|----------------------------------|----------------------|----------------------|---|---|
| Min width                        | 0.8                  | 6                    | - | - |
| Max width                        | 1.3                  | 12                   | - | - |
| Intensity above local background | 100                  | 5                    | - | - |

Fig. 6C

|                                  | <b>W1</b> | <b>W2</b> | <b>W3</b> | <b>W4</b> |
|----------------------------------|-----------|-----------|-----------|-----------|
| Min width                        | 5         | 5         | 3         | -         |
| Max width                        | 15        | 50        | 50        | -         |
| Intensity above local background | 40        | 5         | 5         | -         |
| Minimum stained area             | -         | 10        | 10        | -         |

Fig. 6D

|  | <b>W1</b> | <b>W2</b> | <b>W3</b> | <b>W4</b> |
|--|-----------|-----------|-----------|-----------|
|--|-----------|-----------|-----------|-----------|

|                                  |    |    |    |    |
|----------------------------------|----|----|----|----|
| Min width                        | 6  | 5  | 3  | 3  |
| Max width                        | 15 | 50 | 50 | 50 |
| Intensity above local background | 40 | 5  | 8  | 8  |
| Minimum stained area             | -  | 10 | 10 | 10 |

Fig. 6E

|                                  | <b>W1</b> | <b>W2 (red)</b> | <b>W3</b> | <b>W4</b> |
|----------------------------------|-----------|-----------------|-----------|-----------|
| Min width                        | 5         | 2               | -         | -         |
| Max width                        | 20        | 20              | -         | -         |
| Intensity above local background | 50        | 15              | -         | -         |
| Minimum stained area             | -         | 5               | -         | -         |

Fig. 7A

|                                  | <b>W1</b> | <b>W2</b> | <b>W3</b> | <b>W4</b> |
|----------------------------------|-----------|-----------|-----------|-----------|
| Min width                        | 5.5       | 1         | 1         | 1         |
| Max width                        | 12        | 20        | 20        | 20        |
| Intensity above local background | 16        | 40        | 40        | 90        |
| Minimum stained area             | -         | 30        | 30        | 30        |

Fig. 7B Supplementary Fig. 7

|                                  | <b>W1</b> | <b>W2</b> | <b>W3</b> | <b>W4</b> |
|----------------------------------|-----------|-----------|-----------|-----------|
| Min width                        | 5.5       | 1         | 1         | 1         |
| Max width                        | 12        | 20        | 20        | 20        |
| Intensity above local background | 16        | 40        | 40        | 90        |
| Minimum stained area             | -         | 30        | 30        | 30        |

Fig. 8A

|                                  | <b>W1</b> | <b>W2</b> | <b>W3</b> | <b>W4</b> |
|----------------------------------|-----------|-----------|-----------|-----------|
| Min width                        | 5.5       | 1         | 1         | 1         |
| Max width                        | 15        | 20        | 20        | 20        |
| Intensity above local background | 10        | 40        | 40        | 90        |



|                      |   |    |    |    |
|----------------------|---|----|----|----|
| Minimum stained area | - | 30 | 30 | 30 |
|----------------------|---|----|----|----|

Fig. 9D

|                                  | <b>W1</b> | <b>W2</b> | <b>W3</b> | <b>W4</b> |
|----------------------------------|-----------|-----------|-----------|-----------|
| Min width                        | 5         | 1         | 5         | -         |
| Max width                        | 10        | 7         | 10        | -         |
| Intensity above local background | 5         | 30        | 5         | -         |
| Minimum stained area             | -         | 5         | 30        | -         |

Fig. 9D - 2

Cell scoring

|                                  | <b>W1</b> | <b>W2</b> | <b>W3</b> | <b>W4</b> |
|----------------------------------|-----------|-----------|-----------|-----------|
| Min width                        | 4         | 5         | -         | -         |
| Max width                        | 6         | 6         | -         | -         |
| Intensity above local background | 5         | 18        | -         | -         |
| Stained area                     | -         | Nucleus   | -         | -         |

Granularity

|                                  | <b>Granule image</b> | <b>Nuclear image</b> | - | - |
|----------------------------------|----------------------|----------------------|---|---|
| Min width                        | 1.5                  | 5                    | - | - |
| Max width                        | 7                    | 6                    | - | - |
| Intensity above local background | 70/20                | 18                   | - | - |

Fig. 9G

|                                  | <b>W1</b> | <b>W2</b> | <b>W3</b> | <b>W4</b> |
|----------------------------------|-----------|-----------|-----------|-----------|
| Min width                        | 5         | 5         | 5         | -         |
| Max width                        | 8         | 50        | 15        | -         |
| Intensity above local background | 5         | 10        | 18        | -         |
| Minimum stained area             | -         | 50        | 50        | -         |

Fig. 9G - 2

|                                  | <b>W1</b> | <b>W2</b> | <b>W3</b> | <b>W4</b> |
|----------------------------------|-----------|-----------|-----------|-----------|
| Min width                        | 5         | 3         | 3         |           |
| Max width                        | 8         | 40        | 40        |           |
| Intensity above local background | 5         | 5         | 15        |           |
| Minimum stained area             | -         | 50        | 50        |           |

Supplementary Fig. 3A

|                                  | <b>W1</b> | <b>W2</b> | <b>W3</b> | <b>W4</b> |
|----------------------------------|-----------|-----------|-----------|-----------|
| Min width                        | 4         | 10        | 7         | -         |
| Max width                        | 8         | 30        | 40        | -         |
| Intensity above local background | 20        | 6         | 5         | -         |
| Minimum stained area             | -         | 10        | 10        | -         |

Supplementary Fig. 4

|                                  | <b>W1</b> | <b>W2</b> | <b>W3</b> | <b>W4</b> |
|----------------------------------|-----------|-----------|-----------|-----------|
| Min width                        | 6         | 3         | 3         | -         |
| Max width                        | 30        | 20        | 20        | -         |
| Intensity above local background | 20        | 15        | 20        | -         |
| Minimum stained area             | -         | 3         | 1         | -         |

Supplementary Fig. 6A

|                                  | <b>W1</b> | <b>W2</b> | <b>W3</b> | <b>W4</b> |
|----------------------------------|-----------|-----------|-----------|-----------|
| Min width                        | 5         | 10        | 10        | -         |
| Max width                        | 10        | 40        | 40        | -         |
| Intensity above local background | 5         | 7         | 7         | -         |
| Minimum stained area             | -         | 10        | 10        | -         |
